# Supplementary material for: The visibility of smoking in Europe and its relationship with youth’s positive beliefs about smoking
Source: Springer Nature journal article supplement (doi:10.1007/s00038-019-01288-z), 2019-09-05
Supplement: MOESM1 [file 17142032]

**Supplementary table 1:** Visibility of smoking in different locations, stratified by country. (Smoking Inequalities: Learning from Natural Experiments - Realist survey, Europe, 2016/17)

| <b>Smoking visibility (%)</b>       | <b>Ireland</b> | <b>Finland</b> | <b>Netherlands</b> | <b>Belgium</b> | <b>Italy</b> | <b>Germany</b> | <b>Portugal</b> |
|-------------------------------------|----------------|----------------|--------------------|----------------|--------------|----------------|-----------------|
| <b>At home</b>                      |                |                |                    |                |              |                |                 |
| Yes                                 | 28.9           | 23.9           | 29.8               | 47.6           | 47.6         | 44.0           | 31.9            |
| No                                  | 70.2           | 72.7           | 69.7               | 49.8           | 51.7         | 55.1           | 67.8            |
| Never goes here                     | 0.9            | 3.4            | 0.5                | 2.6            | 0.7          | 0.9            | 0.3             |
| <b>At a friend's home</b>           |                |                |                    |                |              |                |                 |
| Yes                                 | 36.3           | 25.5           | 40.6               | 63.2           | 62.7         | 37.1           | 36.0            |
| No                                  | 61.9           | 70.2           | 57.6               | 33.4           | 35.7         | 58.4           | 61.5            |
| Never goes here                     | 1.8            | 4.3            | 1.8                | 3.5            | 1.6          | 4.6            | 2.5             |
| <b>At a bar or club</b>             |                |                |                    |                |              |                |                 |
| Yes                                 | 71.5           | 22.7           | 51.3               | 47.8           | 87.8         | 40.2           | 86.6            |
| No                                  | 16.7           | 34.2           | 13.4               | 10.9           | 6.5          | 13.1           | 3.1             |
| Never goes here                     | 11.8           | 43.1           | 35.3               | 41.3           | 5.7          | 46.7           | 10.3            |
| <b>At restaurants</b>               |                |                |                    |                |              |                |                 |
| Yes                                 | 49.4           | 25.8           | 68.9               | 46.1           | 65.1         | 63.8           | 70.6            |
| No                                  | 49.2           | 66.7           | 28.2               | 49.1           | 31.7         | 5.6            | 28.7            |
| Never goes here                     | 1.3            | 7.5            | 2.9                | 4.8            | 3.2          | 30.7           | 0.7             |
| <b>At a train or bus station</b>    |                |                |                    |                |              |                |                 |
| Yes                                 | 84.5           | 84.7           | 83.7               | 96.6           | 74.1         | 94.2           | 79.5            |
| No                                  | 12.4           | 10.9           | 6.5                | 1.2            | 14.0         | 3.3            | 14.2            |
| Never goes here                     | 3.1            | 4.4            | 9.8                | 2.2            | 11.9         | 2.5            | 6.3             |
| <b>At leisure/sports facilities</b> |                |                |                    |                |              |                |                 |
| Yes                                 | 21.5           | 29.3           | 48.9               | 26.4           | 39.0         | 36.8           | 46.6            |
| No                                  | 72.2           | 64.1           | 45.2               | 59.0           | 49.0         | 53.3           | 44.9            |
| Never goes here                     | 6.3            | 6.6            | 5.9                | 14.6           | 12.0         | 9.9            | 8.5             |
